## Correction: Alpha-Herpesvirus Infection Induces the Formation of Nuclear Actin Filaments

Becket Feierbach, Silvia Piccinotti, Margaret Bisher, Winifred Denk, Lynn W. Enquist

DOI: 10.1371/journal.ppat.0020085

In *PLoS Pathogens*, volume 2, issue 8:

Figure 9 did not include the asterisks and arrowheads that were referred to in its legend. The original legend and correct version of Figure 9 are included below.

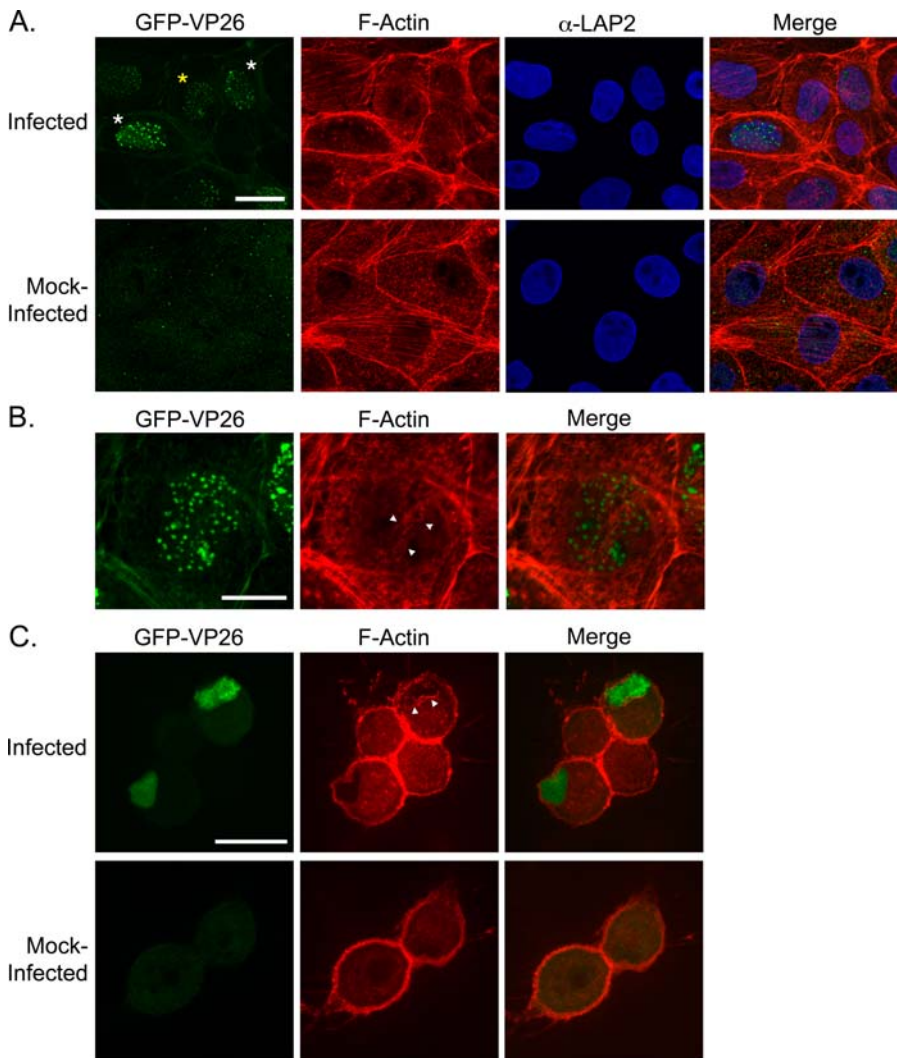

**Figure 9.** Conservation of Formation of Nuclear Actin Filaments

(A) PK15s infected with PRV expressing GFP-VP26, fixed at 9 hpi. Asterisks show cells that are infected and show short actin filaments that appear to associate with nuclear membrane. Each image is a 2-D projection from four consecutive layers in an image stack, taken 0.1  $\mu\text{m}$  apart. Scale bar = 20  $\mu\text{m}$ .

(B) Enlarged image of nucleus labeled with yellow asterisk in (A). Arrowhead indicates nuclear actin filaments. Scale bar = 10  $\mu\text{m}$ .

(C) SCG neurons infected with HSV-1 (KOS), fixed at 15 hpi. Cells were stained for the presence of viral capsid with anti-VP5 (capsid protein) antibody. Arrowheads indicate nuclear actin filaments. Each image is a 2-D projection from four consecutive layers in an image stack, taken 0.5  $\mu\text{m}$  apart. Scale bar = 20  $\mu\text{m}$ .

This correction note may be found online at DOI: 10.1371/journal.ppat.0020103.

Published September 29, 2006.

Citation: (2006) Correction: Alpha-herpesvirus infection induces the formation of nuclear actin filaments. *PLoS Pathog* 2(9): e103.

DOI: 10.1371/journal.ppat.0020103.
